# Supplementary material for: Functional connectivity of the hippocampus and its subfields in resting‐state networks
Source: PubMed Central journal article supplement (PMC8252772; doi:10.1111/ejn.15213), 2021-05-05
Supplement: EJN-53-3378-s001.pdf [file EJN-53-3378-s001.pdf]

# Supplementary Materials for Functional connectivity of the hippocampus and its subfields in resting-state networks

Laura Ezama<sup>1,3,4</sup>, Juan A. Hernández-Cabrera<sup>1,4,5</sup>,  
Sara Seoane<sup>1,3,4</sup>, Ernesto Pereda<sup>2,3,4</sup> and  
Niels Janssen<sup>1,3,4</sup>

<sup>1</sup>Facultad de Psicología, Universidad de la Laguna, Spain

<sup>2</sup>Facultad de Ingeniería Industrial, Universidad de La Laguna, Spain

<sup>3</sup>Instituto de Tecnologías Biomédicas, Universidad de La Laguna, Spain

<sup>4</sup>Instituto Universitario de Neurociencia, Universidad de la Laguna, Spain

<sup>5</sup>Basque Center on Cognition Brain and Language, San Sebastián, Spain

Corresponding Author:  
Niels Janssen  
Tel: +34 922317502  
e-mail: njanssen@ull.es

## Tables

Table S1: Table of correlations of the FC maps with resting-state networks restricted to cortical voxels. Note these correlations are slightly higher.

| Correlation with FC maps           |      |      |
|------------------------------------|------|------|
| Yeo et al. (2011), 7 networks      | IC0  | IC1  |
| 1 - Visual                         | 0.09 | 0.08 |
| 2 - Somatomotor                    | 0.53 | 0.24 |
| 3 - Dorsal attention               | 0.04 | 0.01 |
| 4 - Ventral attention and salience | 0.01 | 0.00 |
| 5 - Limbic                         | 0.03 | 0.02 |
| 6 - Executive control              | 0.02 | 0.14 |
| 7 - Default mode                   | 0.22 | 0.60 |

Table S2: ANOVA table displaying the results of the analysis that incorporates hemisphere into the regression model.

|                      | Sum Sq  | Mean Sq | NumDF | DenDF | F value | Pr(>F) |
|----------------------|---------|---------|-------|-------|---------|--------|
| Hemisphere           | 20.28   | 20.28   | 1     | 28557 | 123.19  | 0.0000 |
| Brain Region         | 1744.46 | 42.55   | 41    | 28557 | 258.41  | 0.0000 |
| FC                   | 758.00  | 758.00  | 1     | 28557 | 4603.68 | 0.0000 |
| Hemi:Brain Region    | 43.55   | 1.06    | 41    | 28557 | 6.45    | 0.0000 |
| Hemi:FC              | 2.72    | 2.72    | 1     | 28557 | 16.54   | 0.0000 |
| Brain Region:FC      | 1439.56 | 35.11   | 41    | 28557 | 213.25  | 0.0000 |
| Hemi:Brain Region:FC | 33.21   | 0.81    | 41    | 28557 | 4.92    | 0.0000 |

Table S3: Cortical and subcortical areas showing reliable co-activity with IC0 for the left and right hemisphere.

| Hemisphere | Region               | Z-ratio | p-value    |
|------------|----------------------|---------|------------|
| Left       | amygdala             | 27.01   | 4.233E-159 |
|            | postcentral          | 25.08   | 3.325E-137 |
|            | paracentral          | 19.00   | 7.429E-79  |
|            | bankssts             | 18.09   | 1.520E-71  |
|            | hippocampus          | 17.18   | 1.571E-64  |
|            | superior temporal    | 17.16   | 2.247E-64  |
|            | precentral           | 12.48   | 4.194E-34  |
|            | parahippocampal      | 11.17   | 2.398E-27  |
|            | medial orbitofrontal | 7.58    | 1.484E-12  |
|            | frontal pole         | 7.55    | 1.865E-12  |
|            | middle temporal      | 7.07    | 6.669E-11  |
|            | fusiform             | 6.56    | 2.320E-09  |
|            | inferior parietal    | 5.54    | 1.284E-06  |
|            | pars orbitalis       | 4.98    | 2.689E-05  |
|            | temporal pole        | 4.84    | 5.437E-05  |
| Right      | amygdala             | 31.35   | 4.493E-214 |
|            | postcentral          | 30.58   | 9.371E-204 |
|            | hippocampus          | 22.33   | 8.339E-109 |
|            | paracentral          | 21.24   | 1.791E-98  |
|            | superior temporal    | 18.04   | 4.055E-71  |
|            | parahippocampal      | 16.41   | 7.067E-59  |
|            | precentral           | 14.96   | 5.356E-49  |
|            | bankssts             | 13.08   | 1.758E-37  |
|            | fusiform             | 10.38   | 1.260E-23  |
|            | temporal pole        | 6.87    | 2.711E-10  |
|            | medial orbitofrontal | 6.81    | 4.041E-10  |
|            | cuneus               | 6.56    | 2.263E-09  |
|            | frontal pole         | 5.85    | 2.016E-07  |
|            | middle temporal      | 3.97    | 3.083E-03  |

Table S4: Cortical and subcortical areas showing reliable co-activity with IC1 for the left and right hemisphere.

| Hemisphere | Region                     | Z-ratio | p-value    |
|------------|----------------------------|---------|------------|
| Left       | isthmus cingulate          | 29.20   | 7.206E-186 |
|            | precuneus                  | 22.06   | 3.090E-106 |
|            | hippocampus                | 19.72   | 5.709E-85  |
|            | inferior parietal          | 17.01   | 2.727E-63  |
|            | rostral anterior cingulate | 15.50   | 1.514E-52  |
|            | posterior cingulate        | 9.91    | 1.579E-21  |
|            | superior frontal           | 6.02    | 7.435E-08  |
|            | postcentral                | 5.06    | 1.717E-05  |
|            | parahippocampal            | 3.77    | 6.842E-03  |
|            | caudal middle frontal      | 3.31    | 3.858E-02  |
| Right      | isthmus cingulate          | 27.20   | 2.637E-161 |
|            | precuneus                  | 19.13   | 6.204E-80  |
|            | hippocampus                | 18.39   | 6.390E-74  |
|            | rostral anterior cingulate | 14.13   | 9.908E-44  |
|            | inferior parietal          | 12.86   | 3.120E-36  |
|            | posterior cingulate        | 9.83    | 3.397E-21  |
|            | postcentral                | 6.30    | 1.248E-08  |
|            | superior frontal           | 5.74    | 3.978E-07  |
|            | parahippocampal            | 3.57    | 1.477E-02  |
|            | cuneus                     | 3.47    | 2.219E-02  |
|            | medial orbitofrontal       | 3.45    | 2.384E-02  |

Table S5: Areas with higher co-activity in IC0 compared to IC1.

| Region            | Z-ratio | p-value    |
|-------------------|---------|------------|
| amygdala          | 25.70   | 1.065E-145 |
| postcentral       | 11.39   | 4.532E-30  |
| precentral        | 7.16    | 8.133E-13  |
| paracentral       | 6.69    | 2.235E-11  |
| superior temporal | 6.41    | 1.424E-10  |
| bankssts          | 5.85    | 4.964E-09  |
| fusiform          | 2.51    | 1.207E-02  |

Table S6: Areas with higher co-activity in IC1 compared to IC0.

| Region                     | Z-ratio | p-value      |
|----------------------------|---------|--------------|
| posterior cingulate        | 42.93   | < 2.225E-308 |
| isthmus cingulate          | 40.18   | < 2.225E-308 |
| precuneus                  | 39.07   | < 2.225E-308 |
| rostral anterior cingulate | 35.62   | 6.047E-278   |
| pericalcarine              | 35.44   | 4.690E-275   |
| caudal anterior cingulate  | 28.68   | 7.235E-181   |
| rostral middle frontal     | 25.77   | 1.978E-146   |
| inferior parietal          | 23.80   | 3.148E-125   |
| supramarginal              | 21.77   | 4.733E-105   |
| superior frontal           | 18.21   | 4.089E-74    |
| caudal middle frontal      | 17.39   | 1.040E-67    |
| insula                     | 15.22   | 2.731E-52    |
| pars opercularis           | 12.81   | 1.422E-37    |
| transverse temporal        | 12.48   | 9.050E-36    |
| lateral orbitofrontal      | 12.48   | 1.009E-35    |
| pars triangularis          | 11.49   | 1.502E-30    |
| lingual                    | 10.37   | 3.368E-25    |
| hippocampus                | 9.76    | 1.608E-22    |
| caudate                    | 9.53    | 1.535E-21    |
| cuneus                     | 9.08    | 1.069E-19    |
| ventral DC                 | 7.95    | 1.884E-15    |
| middle temporal            | 7.18    | 6.982E-13    |
| entorhinal                 | 6.31    | 2.712E-10    |
| medial orbitofrontal       | 5.66    | 1.512E-08    |
| putamen                    | 5.44    | 5.281E-08    |
| pars orbitalis             | 4.73    | 2.250E-06    |
| pallidum                   | 4.15    | 3.388E-05    |
| frontal pole               | 3.87    | 1.099E-04    |
| lateral occipital          | 3.84    | 1.226E-04    |
| superior parietal          | 3.78    | 1.551E-04    |
| inferior temporal          | 3.12    | 1.799E-03    |

# Figures

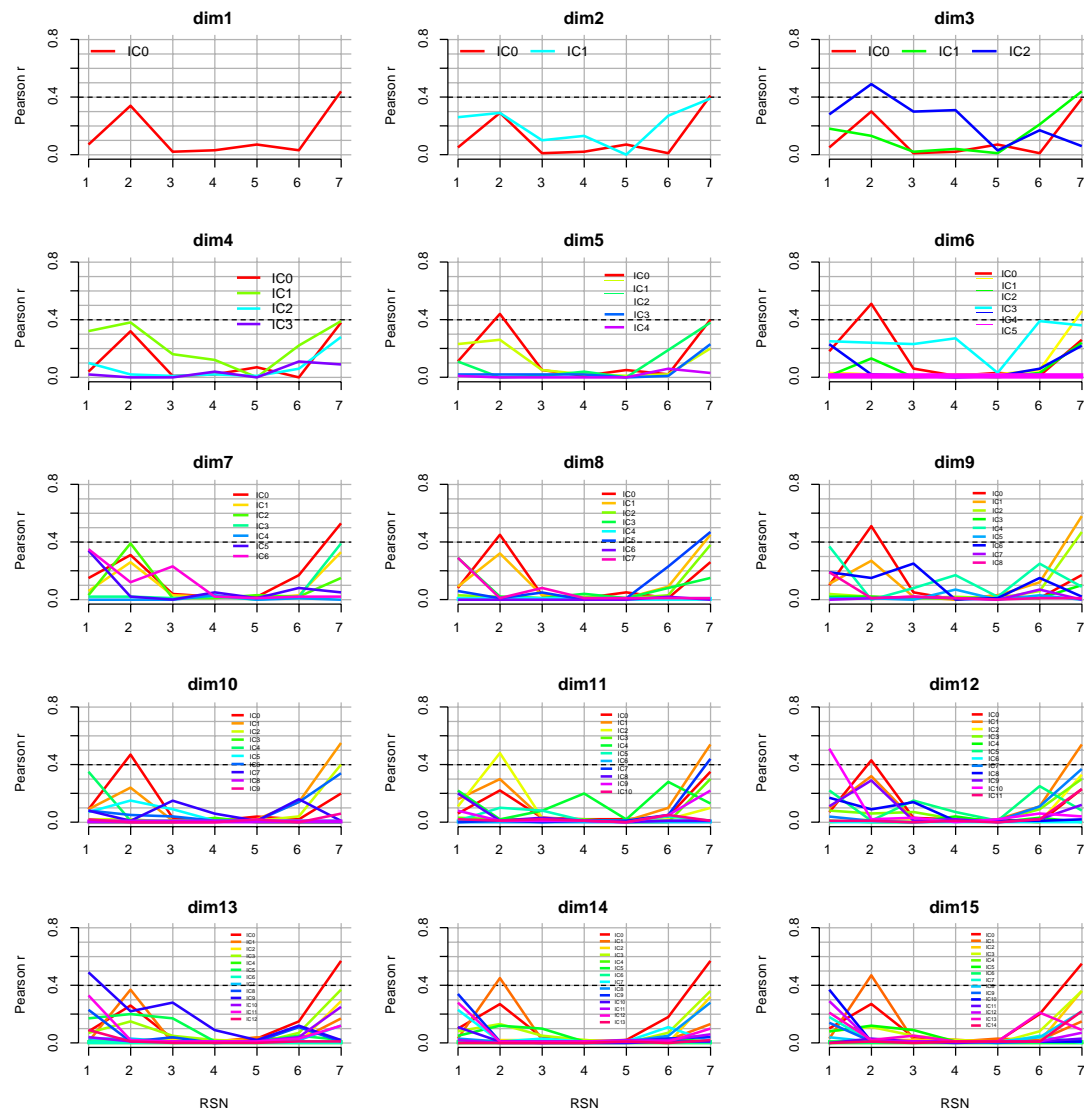

Figure S1: Correlations between independent components derived from srICA at dimensions 1 to 15 and the 7 different resting-state networks. Note how for most dimensions, ICs (and their corresponding whole-brain group level FC maps) show strong correlation ( $r > 0.4$ ) with either detect network 2 (somatomotor) or 7 (default mode), and that dimension 10 is the lowest dimension where both ICs show strong and unique correlations (one IC correlates sufficiently with one and only one network, one network correlates sufficiently with one and only one IC) with the resting-state networks. See main text for further details.



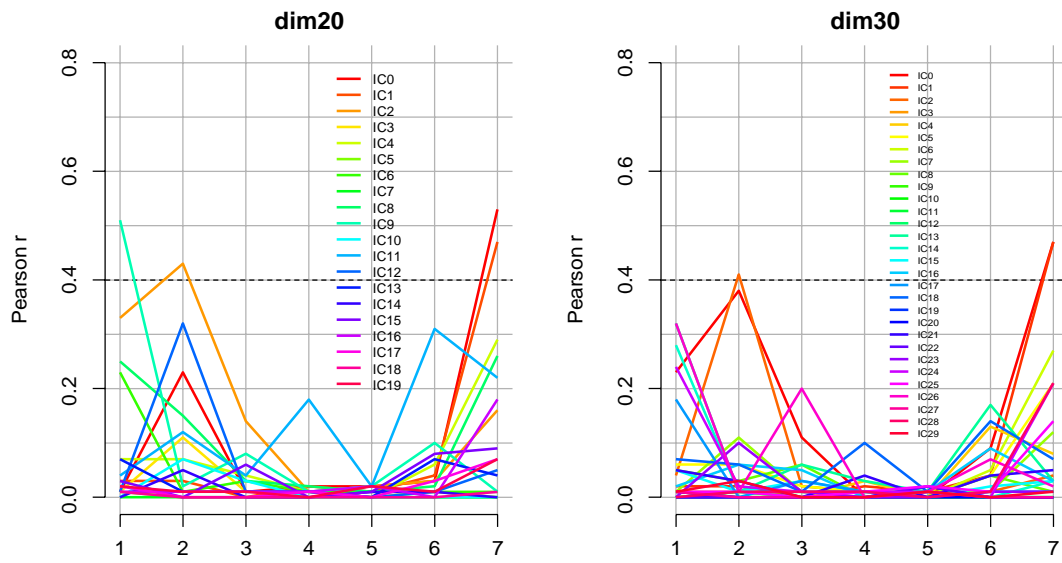

Figure S2: Correlations between independent components derived from srICA at dimensions 20 and 30 with the 7 different resting-state networks. Note how also for these higher dimensions, ICs (and their corresponding whole-brain group level FC maps) show strong correlation ( $r > 0.4$ ) with either detect network 2 (somatomotor) or 7 (default mode). See main text for further details.

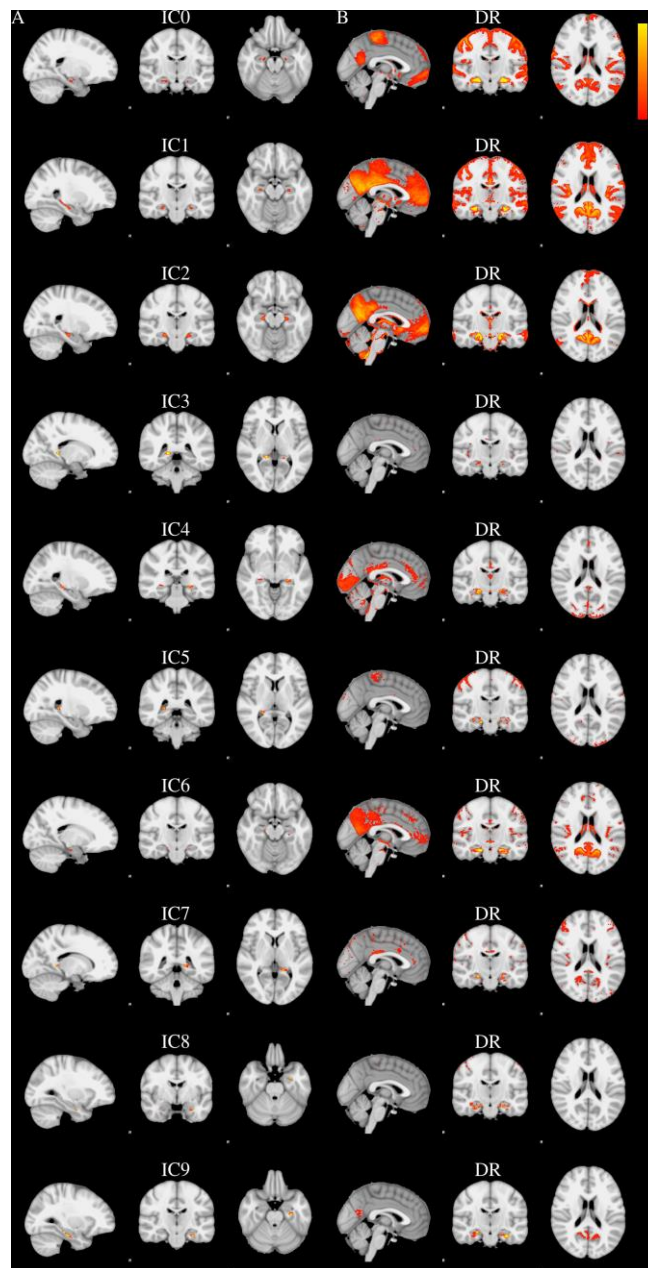

Figure S3: Overview of results from spatially restricted group ICA (left column) and Dual regression (right column) using dimension = 10 for all detected ICs in the HCP dataset. IC0 and IC1 were identified as having strong and unique correlations with resting-state networks. Red colors refer to low t-values and yellow colors to high t-values. Note how IC2 looks like default mode network but has activation in non-gray matter regions like ventricles. Note also how such artefacts can only be detected when no gray matter masks are used.
